# Supplementary figures and images for: Ultra low density of interfacial traps with mixed thermal and plasma enhanced ALD of high-κ gate dielectrics
Source: Royal Society of Chemistry journal article supplement (doi:10.1039/c5ra26860e), 2016-01-01

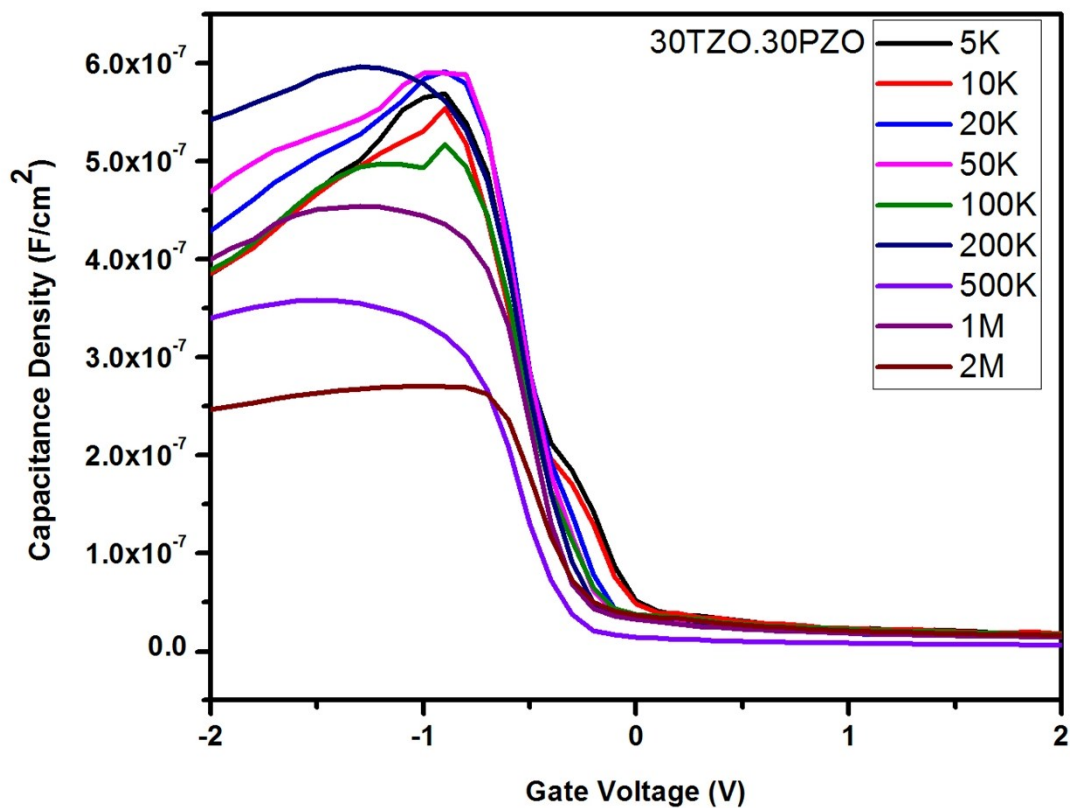

The CV results for 30TALD ZrO<sub>2</sub> +30PEALD ZrO<sub>2</sub>

Supplement: c5ra26860e1.pdf [file c5ra26860e1.pdf]
